# Supplementary material for: Dual targeting of HSP70 does not induce the heat shock response and synergistically reduces cell viability in muscle invasive bladder cancer
Source: PubMed Central journal article supplement (PMC6135696; doi:10.18632/oncotarget.26021), 2018-08-24
Supplement: oncotarget-09-32702-s001.pdf [file oncotarget-09-32702-s001.pdf]

## Dual targeting of HSP70 does not induce the heat shock response and synergistically reduces cell viability in muscle invasive bladder cancer

### SUPPLEMENTARY MATERIALS

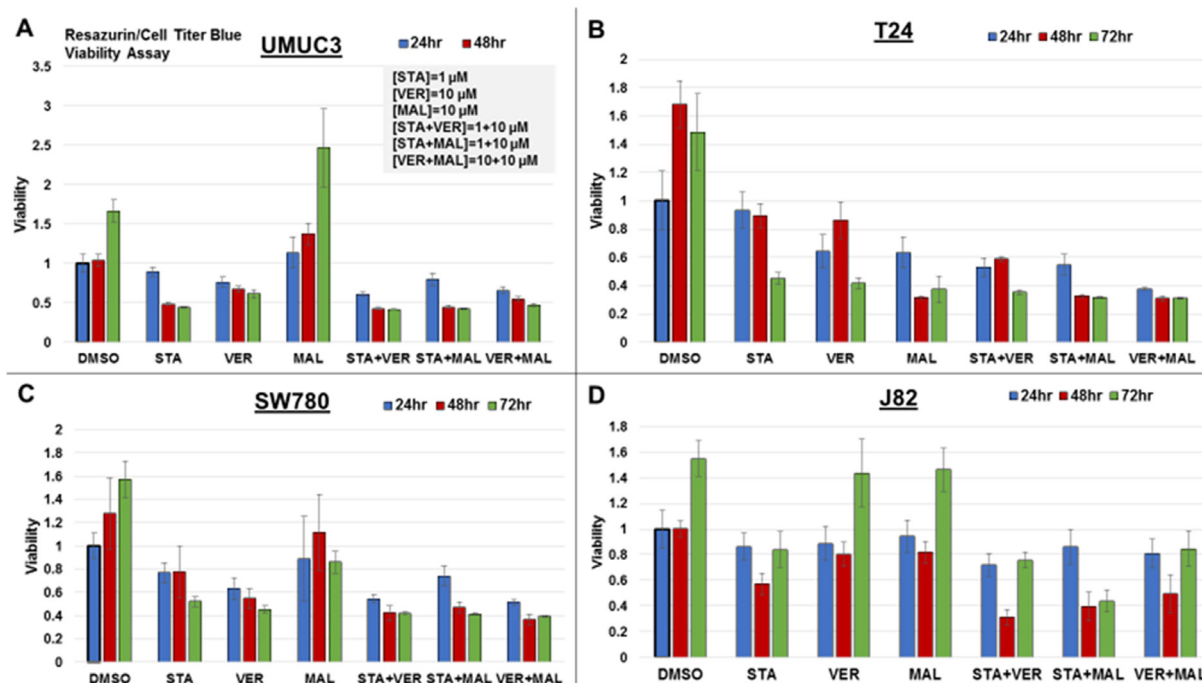

**Supplementary Figure 1: Combinations of Hsp70 and Hsp90 inhibitors reduce cell viability to different degrees over time.** MIBC cell lines (A) UMUC3, (B) T24, (C) SW780 and (D) J82 were plated and treated with STA, VER and MAL alone or in combination for 24, 48, and 72 hours. Cell viability was determined by resazurin and normalized to the 24-hour DMSO control for each cell line  $\pm$  standard deviation.

| UMUC3   | 24hr-48h | 48h-72h | 24h-72h |
|---------|----------|---------|---------|
| STA     | 0.077    | 0.053   | 0.191   |
| VER     | 0.117    | <.001   | <.001   |
| MAL     | 0.039    | <.001   | <.001   |
| STA+VER | 0.002    | 0.002   | 0.180   |
| STA+MAL | 0.030    | <.001   | 0.007   |
| VER+MAL | 0.027    | <.001   | 0.011   |

| T24     | 24hr-48h | 48h-72h | 24h-72h |
|---------|----------|---------|---------|
| STA     | <.001    | 0.013   | 0.004   |
| VER     | <.001    | <.001   | 0.484   |
| MAL     | 0.021    | 0.013   | 0.538   |
| STA+VER | 0.484    | <.001   | 0.008   |
| STA+MAL | 0.026    | 0.110   | 0.003   |
| VER+MAL | 0.008    | 0.074   | <.001   |

p<0.017

| SW780   | 24hr-48h | 48h-72h | 24h-72h |
|---------|----------|---------|---------|
| STA     | 0.137    | 0.626   | 0.017   |
| VER     | 0.044    | 0.451   | 0.013   |
| MAL     | 0.106    | 0.200   | <.001   |
| STA+VER | <.001    | <.001   | <.001   |
| STA+MAL | 0.091    | 0.028   | 0.001   |
| VER+MAL | 0.218    | 0.077   | 0.001   |

| J82     | 24hr-48h | 48h-72h | 24h-72h |
|---------|----------|---------|---------|
| STA     | <.001    | 0.248   | 0.005   |
| VER     | 0.218    | <.001   | <.001   |
| MAL     | 0.741    | <.001   | <.001   |
| STA+VER | <.001    | <.001   | 0.003   |
| STA+MAL | <.001    | 0.013   | <.001   |
| VER+MAL | <.001    | 0.859   | <.001   |

Supplementary Figure 2: Statistical analysis of each drug treatment across each time point for Figure 2. Student *T*-tests were used to compare each timepoint. Significance was noted as  $p < 0.05/3$  comparisons = 0.017. Values are color coded based on the timepoint that had the lowest cell viability.

| UMUC3 |       |       |       |         |         |         |
|-------|-------|-------|-------|---------|---------|---------|
| 24hr  | STA   | VER   | MAL   | STA+VER | STA+MAL | VER+MAL |
| DMSO  | 0.017 | 0.437 | 0.132 | 0.145   | 0.044   | 0.118   |
|       | STA   | 0.120 | 0.002 | 0.378   | 0.469   | 0.720   |
|       |       | VER   | 0.068 | 0.511   | 0.312   | 0.343   |
|       |       |       | MAL   | 0.022   | 0.005   | 0.023   |
|       |       |       |       | STA+VER | 0.789   | 0.696   |
|       |       |       |       |         | STA+MAL | 0.841   |

| T24  |       |       |       |         |         |         |
|------|-------|-------|-------|---------|---------|---------|
| 24hr | STA   | VER   | MAL   | STA+VER | STA+MAL | VER+MAL |
| DMSO | <.001 | 0.004 | 0.204 | 0.841   | 0.031   | <.001   |
|      | STA   | 0.298 | 0.093 | 0.011   | 0.334   | 0.678   |
|      |       | VER   | 0.337 | 0.056   | 0.869   | 0.508   |
|      |       |       | MAL   | 0.380   | 0.468   | 0.149   |
|      |       |       |       | STA+VER | 0.108   | 0.019   |
|      |       |       |       |         | STA+MAL | 0.489   |

| UMUC3 |       |       |       |         |         |         |
|-------|-------|-------|-------|---------|---------|---------|
| 48hr  | STA   | VER   | MAL   | STA+VER | STA+MAL | VER+MAL |
| DMSO  | <.001 | <.001 | 0.003 | <.001   | <.001   | <.001   |
|       | STA   | 0.017 | <.001 | 0.087   | 0.858   | 0.264   |
|       |       | VER   | <.001 | <.001   | 0.062   | 0.001   |
|       |       |       | MAL   | <.001   | <.001   | <.001   |
|       |       |       |       | STA+VER | 0.139   | 0.595   |
|       |       |       |       |         | STA+MAL | 0.281   |

| T24  |       |       |       |         |         |         |
|------|-------|-------|-------|---------|---------|---------|
| 48hr | STA   | VER   | MAL   | STA+VER | STA+MAL | VER+MAL |
| DMSO | <.001 | <.001 | <.001 | <.001   | <.001   | <.001   |
|      | STA   | 0.759 | <.001 | 0.019   | <.001   | <.001   |
|      |       | VER   | <.001 | 0.002   | <.001   | <.001   |
|      |       |       | MAL   | <.001   | 0.442   | 0.162   |
|      |       |       |       | STA+VER | <.001   | <.001   |
|      |       |       |       |         | STA+MAL | 0.461   |

| UMUC3 |       |       |       |         |         |         |
|-------|-------|-------|-------|---------|---------|---------|
| 72hr  | STA   | VER   | MAL   | STA+VER | STA+MAL | VER+MAL |
| DMSO  | <.001 | <.001 | 0.060 | <.001   | <.001   | <.001   |
|       | STA   | 0.007 | <.001 | 0.999   | 0.228   | 0.474   |
|       |       | VER   | <.001 | 0.002   | 0.034   | 0.008   |
|       |       |       | MAL   | <.001   | <.001   | <.001   |
|       |       |       |       | STA+VER | 0.119   | 0.312   |
|       |       |       |       |         | STA+MAL | 0.431   |

| T24  |       |       |       |         |         |         |
|------|-------|-------|-------|---------|---------|---------|
| 72hr | STA   | VER   | MAL   | STA+VER | STA+MAL | VER+MAL |
| DMSO | <.001 | <.001 | <.001 | <.001   | <.001   | <.001   |
|      | STA   | 0.284 | 0.268 | 0.003   | <.001   | <.001   |
|      |       | VER   | 0.865 | 0.026   | <.001   | <.001   |
|      |       |       | MAL   | 0.064   | <.001   | <.001   |
|      |       |       |       | STA+VER | 0.001   | <.001   |
|      |       |       |       |         | STA+MAL | 0.103   |

Supplementary Figure 3: Statistical analysis of UMUC3 and T24 cells at each timepoint for Figure 2. Student *T*-tests were used to compare each timepoint. Significance was noted as  $p < 0.05/21$  comparisons = 0.024. Values are color coded based on the treatment that reduced cell viability the most.

**SW780**

| 24hr        | STA        | VER        | MAL        | STA+VER        | STA+MAL        | VER+MAL |
|-------------|------------|------------|------------|----------------|----------------|---------|
| <b>DMSO</b> | <0.001     | 0.290      | 0.004      | 0.565          | 0.046          | <0.001  |
|             | <b>STA</b> | 0.047      | 0.018      | 0.003          | 0.209          | 0.033   |
|             |            | <b>VER</b> | 0.390      | 0.572          | 0.425          | 0.010   |
|             |            |            | <b>MAL</b> | 0.071          | 0.901          | <0.001  |
|             |            |            |            | <b>STA+VER</b> | 0.143          | <0.001  |
|             |            |            |            |                | <b>STA+MAL</b> | 0.042   |

**J82**

| 24hr        | STA        | VER        | MAL        | STA+VER        | STA+MAL        | VER+MAL |
|-------------|------------|------------|------------|----------------|----------------|---------|
| <b>DMSO</b> | <0.001     | 0.355      | 0.923      | 0.357          | 0.113          | 0.185   |
|             | <b>STA</b> | <0.001     | <0.001     | <0.001         | 0.019          | <0.001  |
|             |            | <b>VER</b> | 0.296      | 0.959          | 0.423          | 0.044   |
|             |            |            | <b>MAL</b> | 0.295          | 0.093          | 0.190   |
|             |            |            |            | <b>STA+VER</b> | 0.384          | 0.038   |
|             |            |            |            |                | <b>STA+MAL</b> | 0.017   |

**SW780**

| 48hr        | STA        | VER        | MAL        | STA+VER        | STA+MAL        | VER+MAL |
|-------------|------------|------------|------------|----------------|----------------|---------|
| <b>DMSO</b> | 0.001      | <0.001     | 0.015      | <0.001         | <0.001         | <0.001  |
|             | <b>STA</b> | 0.116      | 0.435      | 0.085          | 0.073          | 0.032   |
|             |            | <b>VER</b> | 0.035      | 0.703          | 0.562          | 0.092   |
|             |            |            | <b>MAL</b> | 0.025          | 0.022          | 0.011   |
|             |            |            |            | <b>STA+VER</b> | 0.745          | 0.101   |
|             |            |            |            |                | <b>STA+MAL</b> | 0.334   |

**J82**

| 48hr        | STA        | VER        | MAL        | STA+VER        | STA+MAL        | VER+MAL |
|-------------|------------|------------|------------|----------------|----------------|---------|
| <b>DMSO</b> | <0.001     | 0.016      | 0.463      | <0.001         | <0.001         | <0.001  |
|             | <b>STA</b> | 0.001      | <0.001     | 0.067          | 0.697          | 0.072   |
|             |            | <b>VER</b> | 0.034      | <0.001         | 0.003          | 0.007   |
|             |            |            | <b>MAL</b> | <0.001         | <0.001         | <0.001  |
|             |            |            |            | <b>STA+VER</b> | 0.126          | 0.001   |
|             |            |            |            |                | <b>STA+MAL</b> | 0.365   |

**SW780**

| 72hr        | STA        | VER        | MAL        | STA+VER        | STA+MAL        | VER+MAL |
|-------------|------------|------------|------------|----------------|----------------|---------|
| <b>DMSO</b> | <0.001     | <0.001     | <0.001     | <0.001         | <0.001         | <0.001  |
|             | <b>STA</b> | 0.003      | <0.001     | <0.001         | <0.001         | <0.001  |
|             |            | <b>VER</b> | <0.001     | <0.001         | 0.003          | 0.001   |
|             |            |            | <b>MAL</b> | <0.001         | <0.001         | <0.001  |
|             |            |            |            | <b>STA+VER</b> | 0.675          | 0.689   |
|             |            |            |            |                | <b>STA+MAL</b> | 0.960   |

**J82**

| 72hr        | STA        | VER        | MAL        | STA+VER        | STA+MAL        | VER+MAL |
|-------------|------------|------------|------------|----------------|----------------|---------|
| <b>DMSO</b> | <0.001     | 0.157      | 0.553      | <0.001         | <0.001         | <0.001  |
|             | <b>STA</b> | <0.001     | <0.001     | 0.002          | <0.001         | 0.532   |
|             |            | <b>VER</b> | 0.066      | <0.001         | <0.001         | <0.001  |
|             |            |            | <b>MAL</b> | <0.001         | <0.001         | <0.001  |
|             |            |            |            | <b>STA+VER</b> | <0.001         | 0.007   |
|             |            |            |            |                | <b>STA+MAL</b> | <0.001  |

**Supplementary Figure 4: Statistical analysis of SW780 and J82 cells at each timepoint for Figure 2.** Student *T*-tests were used to compare each timepoint. Significance was noted as  $p < 0.05/21$  comparisons = 0.024. Values are color coded based on the treatment that reduced cell viability the most.

## UMUC3

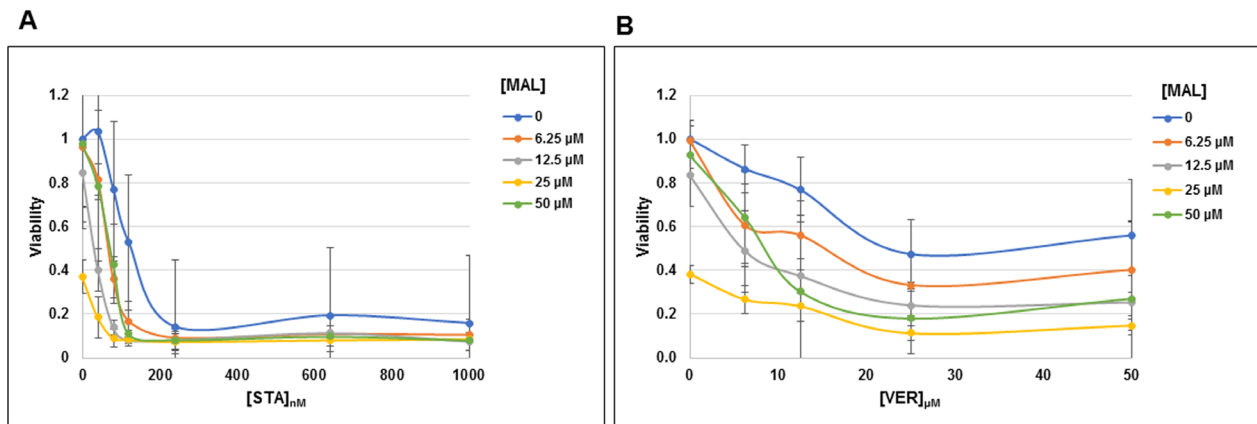

**Supplementary Figure 5: HSP70 and HSP90 inhibitors synergistically reduce UMUC3 cell viability.** Line graph of corresponding to Figure 3. Error bars  $\pm$  standard error. (A) STA+MAL (B) VER+MAL.

## T24

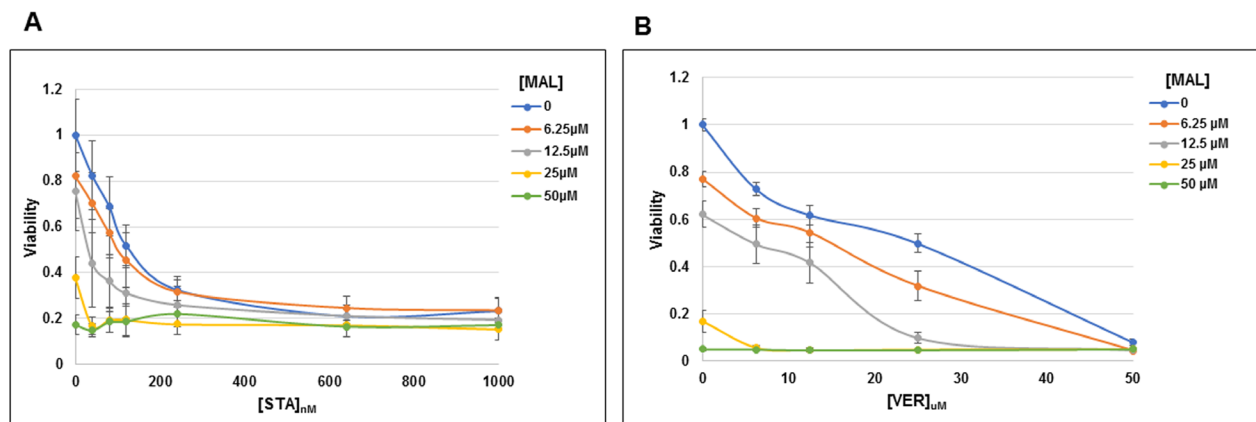

**Supplementary Figure 6: HSP70 and HSP90 inhibitors synergistically reduce T24 cell viability.** Line graph of corresponding to Figure 4. Error bars  $\pm$  standard error. (A) STA+MAL (B) VER+MAL.

### SW780

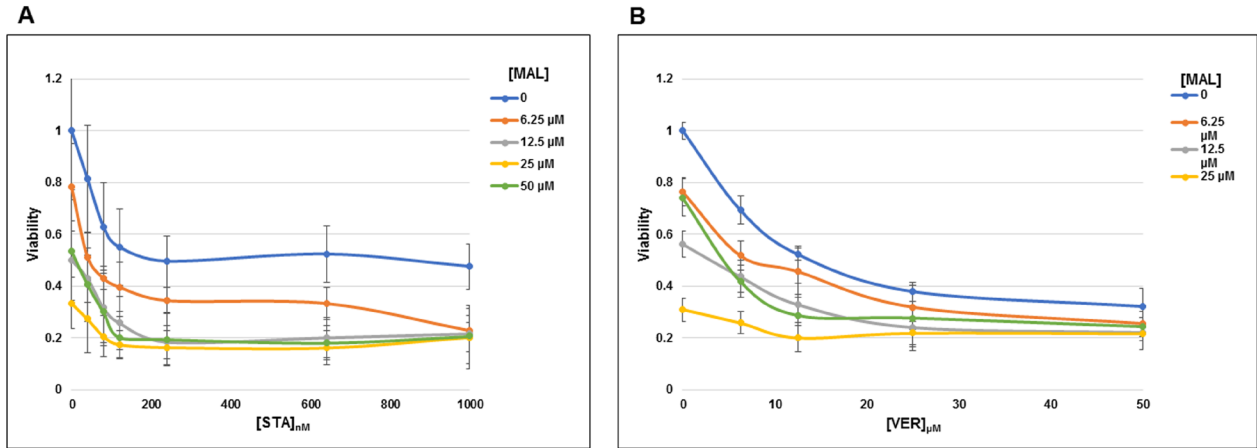

**Supplementary Figure 7: HSP70 and HSP90 inhibitors synergistically reduce SW780 cell viability.** Line graph of corresponding to Figure 5. Error bars  $\pm$  standard error. (A) STA+MAL (B) VER+MAL.

### J82

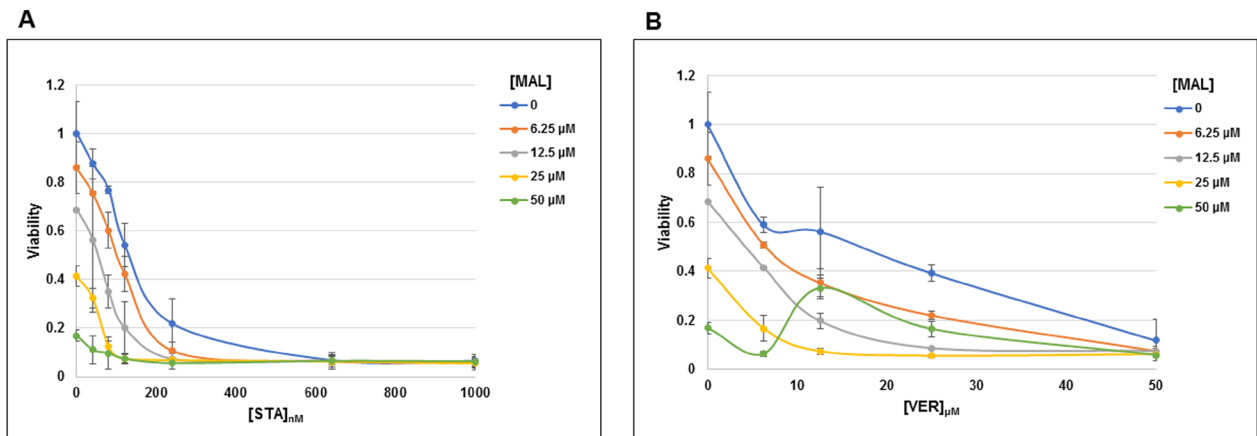

**Supplementary Figure 8: HSP70 and HSP90 inhibitors synergistically reduce J82 cell viability.** Line graph of corresponding to Figure 6. Error bars  $\pm$  standard error. (A) STA+MAL (B) VER+MAL.

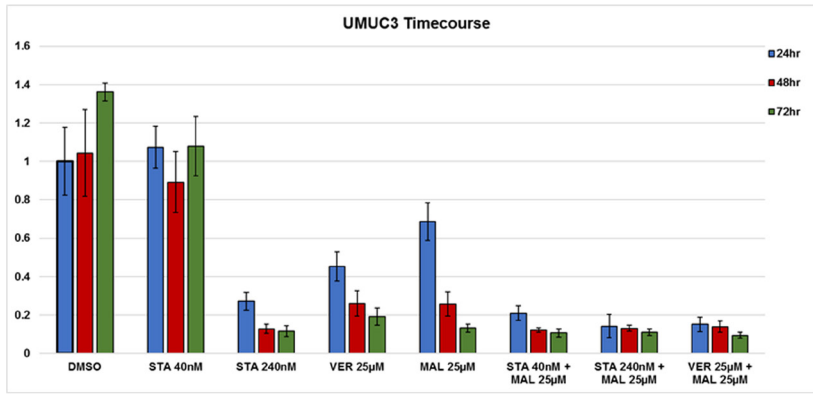

| 24hrs     | STA 40nM | STA 240nM | VER 25µM | MAL 25µM | STA 40nM+MAL 25µM | STA 240nM+MAL 25µM | VER 25µM+MAL 25µM |
|-----------|----------|-----------|----------|----------|-------------------|--------------------|-------------------|
| DMSO      | 0.181    | <.001     | <.001    | <.001    | <.001             | <.001              | <.001             |
| STA 40nM  |          | <.001     | <.001    | <.001    | <.001             | <.001              | <.001             |
| STA 240nM |          |           | <.001    | <.001    | <.001             | <.001              | <.001             |
| VER 25µM  |          |           |          | 0.002    | <.001             | <.001              | <.001             |
| MAL 25µM  |          |           |          |          | <.001             | <.001              | <.001             |

\*p<0.0018

| 48hrs     | STA 40nM | STA 240nM | VER 25µM | MAL 25µM | STA 40nM+MAL 25µM | STA 240nM+MAL 25µM | VER 25µM+MAL 25µM |
|-----------|----------|-----------|----------|----------|-------------------|--------------------|-------------------|
| DMSO      | 0.010    | <.001     | <.001    | <.001    | <.001             | <.001              | <.001             |
| STA 40nM  |          | <.001     | <.001    | <.001    | <.001             | <.001              | <.001             |
| STA 240nM |          |           | <.001    | <.001    | 0.217             | 0.360              | 0.155             |
| VER 25µM  |          |           |          | 0.418    | <.001             | <.001              | <.001             |
| MAL 25µM  |          |           |          |          | <.001             | <.001              | <.001             |

\*p<0.0018

| 72hrs     | STA 40nM | STA 240nM | VER 25µM | MAL 25µM | STA 40nM+MAL 25µM | STA 240nM+MAL 25µM | VER 25µM+MAL 25µM |
|-----------|----------|-----------|----------|----------|-------------------|--------------------|-------------------|
| DMSO      | 0.010    | <.001     | <.001    | <.001    | <.001             | <.001              | <.001             |
| STA 40nM  |          | <.001     | <.001    | <.001    | <.001             | <.001              | <.001             |
| STA 240nM |          |           | <.001    | <.001    | 0.217             | 0.360              | 0.155             |
| VER 25µM  |          |           |          | 0.418    | <.001             | <.001              | <.001             |
| MAL 25µM  |          |           |          |          | <.001             | <.001              | <.001             |

\*p<0.0018

| UMUC3              | 24hr-48h | 48h-72h | 24h-72h |
|--------------------|----------|---------|---------|
| STA 40nM           | 0.022    | 0.467   | 0.004   |
| STA 240nM          | <.001    | 0.251   | <.001   |
| VER 25µM           | <.001    | <.001   | <.001   |
| MAL 25µM           | <.001    | <.001   | <.001   |
| STA 40nM+MAL 25µM  | <.001    | 0.056   | <.001   |
| STA 240nM+MAL 25µM | 0.328    | 0.001   | 0.12    |
| VER 25µM+MAL 25µM  | 0.266    | 0.002   | 0.005   |

\*p<0.0023

**Supplementary Figure 9: Synergistic dosages of HSP70 and HSP90 inhibitors reduce UMUC3 viability over 24, 48, and 72 hours.** Drug doses that gave greatest reduction in cell viability or the most synergy were given to UMUC3 cells for 24, 48, and 72-hour time points as single agents and in combination. Cell viability was determined by crystal violet and normalized to the 24-hour DMSO control for each cell line ± standard deviation. Student *t*-test values shown with a  $p < 0.0018$  to determine statistical significance between drug conditions for each time point and between each time point.

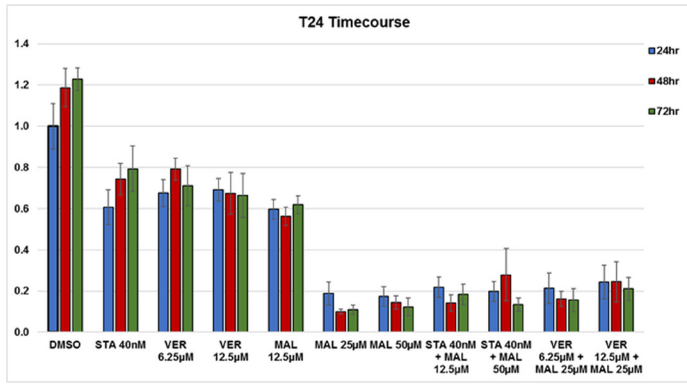

| 48hrs      | STA 40nM | VER 6.25µM | VER 12.5µM | MAL 12.5µM | MAL 25µM | MAL 50µM | STA 40nM+MAL 12.5µM | STA 40nM+MAL 50µM | VER 6.25µM+MAL 25µM | VER 12.5µM+MAL 25µM |
|------------|----------|------------|------------|------------|----------|----------|---------------------|-------------------|---------------------|---------------------|
| DMSO       | <.001    | <.001      | <.001      | <.001      | <.001    | <.001    | <.001               | <.001             | <.001               | <.001               |
| STA 40nM   |          | 0.079      | 0.104      | <.001      | <.001    | <.001    | <.001               | <.001             | <.001               | <.001               |
| VER 6.25µM |          |            |            | 0.021      | <.001    | <.001    | <.001               | <.001             | <.001               | <.001               |
| VER 12.5µM |          |            |            |            | 0.001    | <.001    | <.001               | <.001             | <.001               | <.001               |
| MAL 12.5µM |          |            |            |            |          | <.001    | <.001               | <.001             | <.001               | <.001               |
| MAL 25µM   |          |            |            |            |          |          | <.001               | <.001             | <.001               | <.001               |
| MAL 50µM   |          |            |            |            |          |          | <.001               | <.001             | <.001               | <.001               |

\*p<0.0010

| 72hrs      | STA 40nM | VER 6.25µM | VER 12.5µM | MAL 12.5µM | MAL 25µM | MAL 50µM | STA 40nM+MAL 12.5µM | STA 40nM+MAL 50µM | VER 6.25µM+MAL 25µM | VER 12.5µM+MAL 25µM |
|------------|----------|------------|------------|------------|----------|----------|---------------------|-------------------|---------------------|---------------------|
| DMSO       | <.001    | <.001      | <.001      | <.001      | <.001    | <.001    | <.001               | <.001             | <.001               | <.001               |
| STA 40nM   |          | 0.028      | 0.005      | <.001      | <.001    | <.001    | <.001               | <.001             | <.001               | <.001               |
| VER 6.25µM |          |            |            | 0.024      | <.001    | <.001    | <.001               | <.001             | <.001               | <.001               |
| VER 12.5µM |          |            |            |            | 0.072    | <.001    | <.001               | <.001             | <.001               | <.001               |
| MAL 12.5µM |          |            |            |            |          | <.001    | <.001               | <.001             | <.001               | <.001               |
| MAL 25µM   |          |            |            |            |          |          | <.001               | <.001             | <.001               | <.001               |
| MAL 50µM   |          |            |            |            |          |          | <.001               | <.001             | <.001               | <.001               |

\*p<0.0010

| 24hrs               | STA 40nM | VER 6.25µM | VER 12.5µM | MAL 12.5µM | MAL 25µM | MAL 50µM | STA 40nM+MAL 12.5µM | STA 40nM+MAL 50µM | VER 6.25µM+MAL 25µM | VER 12.5µM+MAL 25µM |
|---------------------|----------|------------|------------|------------|----------|----------|---------------------|-------------------|---------------------|---------------------|
| DMSO                | <.001    | <.001      | <.001      | <.001      | <.001    | <.001    | <.001               | <.001             | <.001               | <.001               |
| STA 40nM            |          | 0.034      | 0.091      | 0.356      | <.001    | <.001    | <.001               | <.001             | <.001               | <.001               |
| VER 6.25µM          |          |            |            | 0.337      | 0.015    | <.001    | <.001               | <.001             | <.001               | <.001               |
| VER 12.5µM          |          |            |            |            | 0.004    | <.001    | <.001               | <.001             | <.001               | <.001               |
| MAL 12.5µM          |          |            |            |            |          | <.001    | <.001               | <.001             | <.001               | <.001               |
| MAL 25µM            |          |            |            |            |          |          | <.001               | <.001             | <.001               | <.001               |
| MAL 50µM            |          |            |            |            |          |          | <.001               | <.001             | <.001               | <.001               |
| STA 40nM+MAL 12.5µM |          |            |            |            |          |          |                     | 0.048             | 0.339               | 0.043               |
| STA 40nM+MAL 50µM   |          |            |            |            |          |          |                     |                   | 0.108               | 0.012               |
| VER 6.25µM+MAL 25µM |          |            |            |            |          |          |                     |                   |                     | 0.014               |
| VER 12.5µM+MAL 25µM |          |            |            |            |          |          |                     |                   |                     |                     |

\*p<0.0010

| T24                 | 24hr-48h | 48h-72h | 24h-72h |
|---------------------|----------|---------|---------|
| STA 40nM            | 0.002    | 0.106   | 0.005   |
| VER 6.25µM          | 0.002    | 0.014   | 0.140   |
| VER 12.5µM          | 0.314    | 0.403   | 0.199   |
| MAL 12.5µM          | 0.103    | 0.008   | 0.187   |
| MAL 25µM            | <.001    | 0.051   | <.001   |
| MAL 50µM            | 0.057    | 0.073   | <.001   |
| STA 40nM+MAL 12.5µM | <.001    | 0.012   | 0.057   |
| STA 40nM+MAL 50µM   | 0.098    | 0.012   | 0.001   |
| VER 6.25µM+MAL 25µM | 0.006    | 0.384   | 0.057   |
| VER 12.5µM+MAL 25µM | 0.489    | 0.225   | 0.141   |

\*p<0.0017

**Supplementary Figure 10: Synergistic dosages of HSP70 and HSP90 inhibitors reduce T24 viability over 24, 48, and 72 hours.** Drug doses that gave greatest reduction in cell viability or most synergy were given to T24 cells for 24, 48, and 72-hour time points as single agents and in combination. Cell viability was determined by crystal violet and normalized to the 24-hour DMSO control for each cell line ± standard deviation. Student *t*-test values shown with a  $p < 0.0010$  to determine statistical significance between drug conditions for each time point and between each time point.

## UMUC3

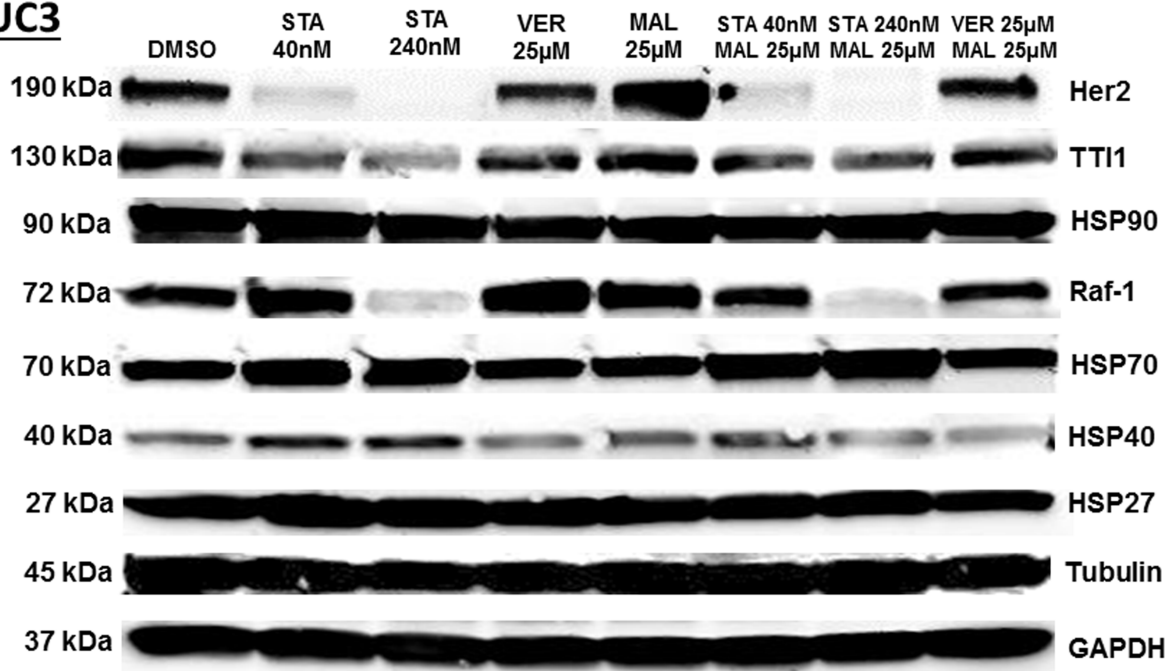

**Supplementary Figure 11: HSP70 and HSP90 inhibitor single agents and combinations alter protein levels of critical kinases and HSPs at 48 hours.** Drug doses that gave greatest reduction in cell viability or the most synergy were given to UMUC3 cells for 48 hours as single agents and in combination. Cells were lysed, followed by protein quantification and western-blot analysis.

## UMUC3

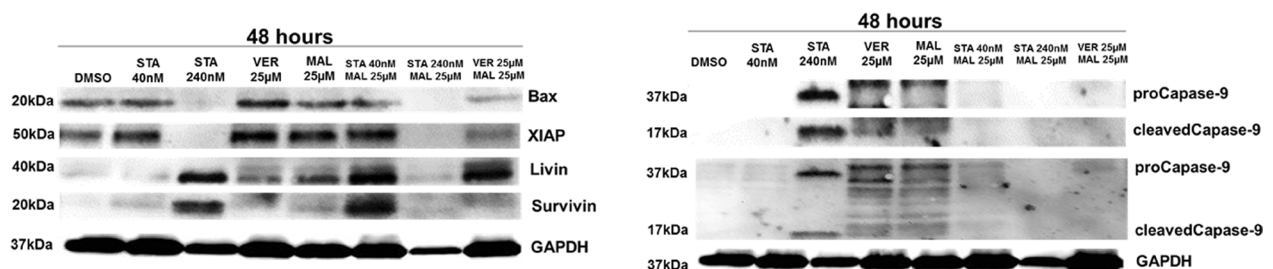

**Supplementary Figure 12: HSP70 and HSP90 inhibitor single agents and combinations alter protein levels of apoptotic and pro-survival components at 48 hours.** Drug doses that gave greatest reduction in cell viability or the most synergy were given to UMUC3 cells for 48 hours as single agents and in combination. Cells were lysed, followed by protein quantification and western-blot analysis. Total protein concentrations were normalized to the STA 240 nM + MAL 25 µM lane.

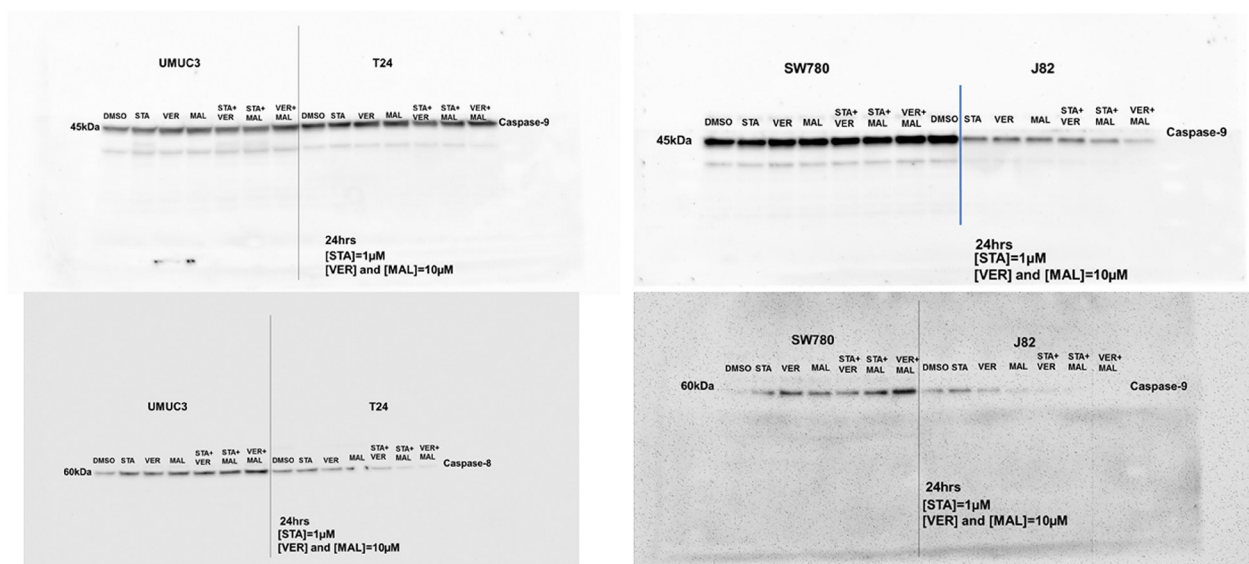

**Supplementary Figure 13: HSP70 and HSP90 inhibitors do not significantly affect Caspase 9 and Caspase 8 cleavage.** UMUC3, T24, SW780 and J82 cells were treated with either 1 μM STA, 10 μM VER, 10 μM MAL, 1 + 10 μM STA+VER, 1 + 10 μM STA+MAL or 10 + 10 μM VER+MAL for 24 hours. Cells were lysed, followed by protein quantification and western-blot analysis.

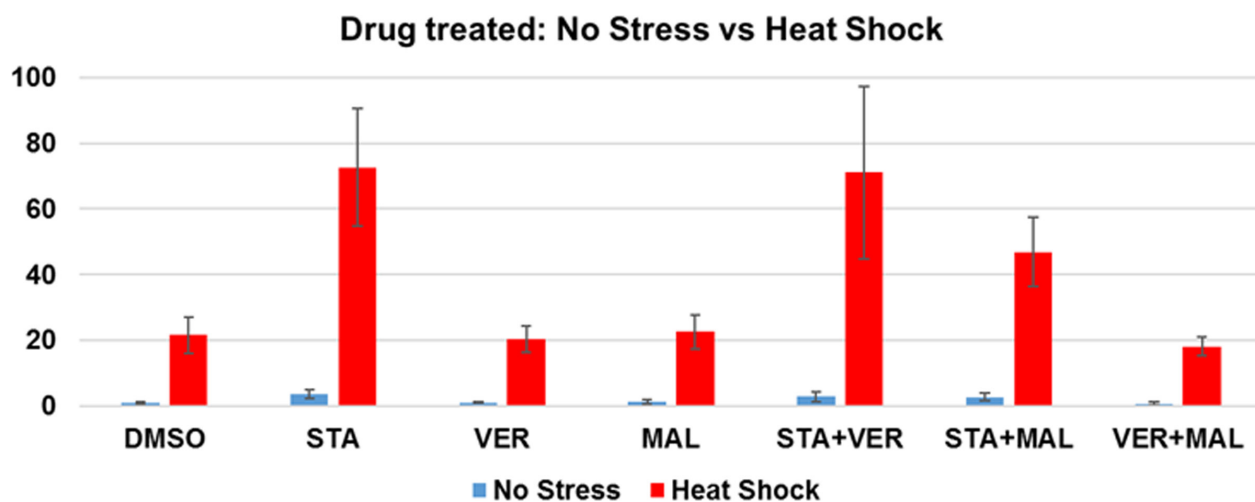

**Supplementary Figure 14: HSP70 inhibitors do not increase the heat shock response.** UMUC3 cells were transfected with a reporter plasmid encoding NanoLuc luciferase driven by a HSP70B' promoter. Cells were treated with the indicated drug concentrations for 9.5 hours then harvested and assayed for NanoLuc activity or were treated with the indicated drugs for 1 hour, heat shocked for 30 minutes at 45° C and allowed to recover for 8 hours before being harvested. NanoLuc activity for each condition was indexed to the DMSO no heat shock control.
